# Supplementary material for: Kinetic instability of sulfurous acid in the presence of ammonia and formic acid
Source: Royal Society of Chemistry journal article supplement (doi:10.1039/d0cp01057j), 2020-01-01
Supplement: d0cp01057j1.pdf [file d0cp01057j1.pdf]

# **ESI for the Kinetic Instability of the Sulfurous Acid in the Presence of Ammonia and Formic Acid**

Subhasish Mallick, Amit Kumar, and Pradeep Kumar\*

*Department of Chemistry, Malaviya National Institute of Technology Jaipur, Jaipur,  
302017, India*

E-mail: [pradeep.chy@mnit.ac.in](mailto:pradeep.chy@mnit.ac.in)

| Sl. No. | Contents                                                                                                                                                                               |
|---------|----------------------------------------------------------------------------------------------------------------------------------------------------------------------------------------|
| 1.      | <b>Table S1:</b> Optimized geometries in cartesian coordinates and all normal mode frequencies calculated at the MP2/aug-cc-pVTZ level of theory.                                      |
| 2.      | <b>Table S2:</b> Bimolecular rate constant $k_b$ in ( $\text{cm}^3 \text{ molecule}^{-1} \text{ sec}^{-1}$ ) of AM, FA, and WM catalyzed channel within the temperature of 213-1000 K. |
| 3.      | <b>Table S3:</b> Half life time in sec. for the catalyzed and uncatalyzed channel at room temperature.                                                                                 |
| 4.      | <b>Table S4:</b> Concentration of Ammonia, Formic acid and Water (in molecules $\text{cm}^{-3}$ ) within the temperature range of 280-320 K.                                           |
| 5.      | <b>Table S5:</b> Concentration of Ammonia, Formic acid and Water (in molecules $\text{cm}^{-3}$ ) at higher altitude.                                                                  |
| 6.      | <b>Table S6:</b> Absolute energies in Hartree for the AM, FA, and WM catalyzed species as well as for the uncatalyzed species optimized at MP2/aug-cc-pVTZ level of theory.            |
| 7.      | <b>Table S7:</b> Product branching ratio ( $\gamma$ ) of catalyzed channels at 1 atm pressure.                                                                                         |
| 8.      | <b>Table S8:</b> Product branching ratio ( $\gamma$ ) of catalyzed channels at higher altitudes.                                                                                       |
| 9.      | <b>Table S9:</b> Product branching ratio ( $\gamma$ ) of catalyzed channels at 298 K.                                                                                                  |
| 10.     | <b>Figure S1:</b> Pressure dependence plot for the decomposition reaction of $\text{H}_2\text{SO}_3$ in the presence of AM, FA, and WM at 298 K                                        |
| 11.     | <b>Figure S2:</b> Time evolution of the relative population of the product complex for AM and FA catalyzed channels at 298 K.                                                          |

Table S1: Optimized geometries in Cartesian coordinates and normal mode frequencies of all species calculate at MP2/aug-cc-pVTZ level of theory

| compound                                            | cartesian coordinate(Å) |             |             | frequency( $\text{cm}^{-1}$ ) |           |           |           |
|-----------------------------------------------------|-------------------------|-------------|-------------|-------------------------------|-----------|-----------|-----------|
| WM                                                  | O                       | 0.00000000  | 0.00000000  | 0.11818900                    | 1627.7613 | 3824.7049 | 3950.6088 |
|                                                     | H                       | 0.00000000  | 0.75802500  | -0.47275400                   |           |           |           |
|                                                     | H                       | 0.00000000  | -0.75802500 | -0.47275400                   |           |           |           |
| FA                                                  | C                       | -0.13228100 | 0.40084000  | 0.00030400                    | 625.8763  | 674.7693  | 1059.0209 |
|                                                     | O                       | -1.13878300 | -0.26223900 | -0.00006900                   | 1130.6399 | 1301.9831 | 1409.2658 |
|                                                     | O                       | 1.12070900  | -0.09253500 | -0.00001600                   | 1793.2981 | 3123.9869 | 3741.6317 |
|                                                     | H                       | -0.09681300 | 1.49274100  | -0.00082200                   |           |           |           |
|                                                     | H                       | 1.03508700  | -1.05959000 | -0.00032000                   |           |           |           |
| AM                                                  | N                       | 0.00000000  | 0.00000000  | 0.11400700                    | 1037.5716 | 1668.9373 | 1668.9373 |
|                                                     | H                       | 0.00000000  | 0.93809600  | -0.26601700                   | 3502.6045 | 3649.5724 | 3649.5724 |
|                                                     | H                       | -0.81241500 | -0.46904800 | -0.26601700                   |           |           |           |
|                                                     | H                       | 0.81241500  | -0.46904800 | -0.26601700                   |           |           |           |
| SO <sub>2</sub>                                     | S                       | 0.00000000  | 0.00000000  | 0.37256200                    | 493.2718  | 1099.0853 | 1305.3854 |
|                                                     | O                       | 0.00000000  | -1.25968300 | -0.37256200                   |           |           |           |
|                                                     | O                       | 0.00000000  | 1.25968300  | -0.37256200                   |           |           |           |
| H <sub>2</sub> SO <sub>3</sub> ( <i>cis-trans</i> ) | S                       | 0.04054400  | 0.14574300  | -0.42300500                   | 237.6446  | 293.2820  | 396.8364  |
|                                                     | O                       | 0.38509500  | 1.34488900  | 0.32736000                    | 460.7578  | 490.6683  | 735.9567  |
|                                                     | O                       | 0.98882000  | -1.07344100 | 0.11868900                    | 773.0322  | 1095.7975 | 1110.9230 |
|                                                     | H                       | 1.12703400  | -0.92866300 | 1.07281600                    | 1282.1183 | 3690.1026 | 3751.9048 |
|                                                     | O                       | -1.38217100 | -0.30970000 | 0.28784800                    |           |           |           |
|                                                     | H                       | -1.70968200 | -1.09720200 | -0.17589900                   |           |           |           |
| RC <sub>AM</sub>                                    | O                       | -0.43622400 | 1.22290400  | 0.69705700                    | 50.0590   | 107.0022  | 117.3363  |
|                                                     | O                       | 0.18597000  | -0.16582000 | -1.28977900                   | 199.0971  | 266.9910  | 316.5524  |
|                                                     | H                       | 1.08669300  | -0.19682100 | -0.78759800                   | 403.1097  | 419.0865  | 458.2586  |
|                                                     | O                       | -0.83465500 | -1.23587000 | 0.59967400                    | 552.7854  | 703.4687  | 895.9831  |
|                                                     | H                       | -1.30137100 | -1.08469000 | 1.43639300                    | 1073.6178 | 1112.3537 | 1140.3763 |
|                                                     | N                       | 2.33452600  | -0.08538800 | 0.24145700                    | 1205.3523 | 1447.2222 | 1659.0768 |
|                                                     | H                       | 1.91541200  | 0.57775500  | 0.88762200                    | 1672.7956 | 2597.8268 | 3476.7701 |
|                                                     | H                       | 3.22707600  | 0.28480300  | -0.05998500                   | 3616.3462 | 3647.7412 | 3762.7347 |
|                                                     | H                       | 2.50679800  | -0.94395500 | 0.75006500                    |           |           |           |
|                                                     | S                       | -0.94356300 | 0.21193200  | -0.24827000                   |           |           |           |
| TS <sub>AM</sub>                                    | O                       | 0.71994200  | -0.12703000 | 1.33925900                    | -211.6355 | 70.3125   | 194.0770  |
|                                                     | O                       | 0.36197200  | -1.06399000 | -0.91547900                   | 266.6909  | 289.5971  | 372.4990  |
|                                                     | H                       | -1.42132100 | -1.07772600 | -0.23917300                   | 407.4223  | 463.0392  | 505.4948  |
|                                                     | O                       | -0.34863500 | 1.39364500  | -0.51439800                   | 558.1405  | 636.7119  | 875.5041  |
|                                                     | H                       | -0.12910100 | 2.10678800  | 0.10414700                    | 1095.3482 | 1202.5648 | 1236.3947 |
|                                                     | N                       | -2.00138600 | -0.35789500 | 0.21997100                    | 1496.3101 | 1557.6765 | 1637.7790 |
|                                                     | H                       | -1.94316900 | -0.49961200 | 1.22350400                    | 1724.2708 | 1945.3714 | 3280.9763 |
|                                                     | H                       | -2.96080100 | -0.37349700 | -0.10212600                   | 3546.3073 | 3639.4783 | 3768.2377 |
|                                                     | H                       | -1.41810800 | 0.57039200  | -0.05628300                   |           |           |           |
|                                                     | S                       | 1.00099800  | 0.00987100  | -0.10905800                   |           |           |           |

| compound         | cartesian coordinate(Å) |             |             | frequency(cm <sup>-1</sup> ) |           |           |           |
|------------------|-------------------------|-------------|-------------|------------------------------|-----------|-----------|-----------|
| PC <sub>AM</sub> | O                       | 1.68034300  | 0.28503000  | 1.00644200                   | 21.8581   | 85.8251   | 93.4327   |
|                  | O                       | 0.33102400  | -1.28240300 | -0.39967900                  | 118.5825  | 133.5760  | 180.2255  |
|                  | H                       | -1.84686800 | -1.21221000 | 0.22504400                   | 228.9191  | 247.5856  | 267.2352  |
|                  | O                       | -0.85527900 | 1.57713800  | -0.42233900                  | 335.5906  | 504.6608  | 535.0421  |
|                  | H                       | -0.82206000 | 2.28633700  | 0.22713600                   | 858.0347  | 1116.5682 | 1120.6559 |
|                  | N                       | -2.57538200 | -0.51371200 | 0.33554900                   | 1303.2595 | 1653.7697 | 1671.7451 |
|                  | H                       | -2.95555000 | -0.62139300 | 1.26777700                   | 1678.9387 | 3378.2487 | 3486.3360 |
|                  | H                       | -3.31570600 | -0.74578600 | -0.31510300                  | 3621.5648 | 3644.1521 | 3876.5851 |
|                  | H                       | -1.56134100 | 0.96567400  | -0.10636900                  |           |           |           |
|                  | S                       | 1.20503200  | -0.10717200 | -0.32017000                  |           |           |           |
| RC <sub>FA</sub> | S                       | -1.36682000 | -0.05835500 | -0.41748200                  | 49.4258   | 72.1672   | 116.9188  |
|                  | O                       | -2.72344700 | 0.10124000  | 0.08485200                   | 163.9259  | 201.5166  | 220.7574  |
|                  | O                       | -0.48958300 | 1.25606300  | 0.19625100                   | 298.4966  | 407.8889  | 435.9692  |
|                  | H                       | -0.88969600 | 1.46055400  | 1.06159600                   | 497.2693  | 646.8333  | 680.7879  |
|                  | O                       | -0.72892100 | -1.20846200 | 0.51407700                   | 774.5210  | 831.8415  | 923.0801  |
|                  | H                       | 0.23517000  | -1.27700700 | 0.28203000                   | 1082.8242 | 1104.7576 | 1234.0329 |
|                  | C                       | 2.63298700  | -0.16455600 | -0.08500300                  | 1254.7570 | 1311.8392 | 1392.6972 |
|                  | O                       | 1.90113400  | -1.14007100 | -0.08802600                  | 1438.1958 | 1749.0529 | 3140.8476 |
|                  | O                       | 2.25772200  | 1.09557100  | 0.03295200                   | 3294.3988 | 3401.3178 | 3686.8955 |
|                  | H                       | 3.71646300  | -0.24443000 | -0.18625400                  |           |           |           |
| H                | 1.27401400              | 1.14716000  | 0.11150100  |                              |           |           |           |
| TS <sub>FA</sub> | S                       | -1.39128000 | -0.19498200 | -0.40062800                  | -982.7045 | 51.8597   | 73.4615   |
|                  | O                       | -2.60355600 | 0.06459800  | 0.36581200                   | 155.9665  | 253.8797  | 290.0760  |
|                  | O                       | -0.41072500 | 1.38377900  | -0.07206400                  | 322.9541  | 429.0778  | 473.0979  |
|                  | H                       | -0.82771400 | 1.73272400  | 0.73445300                   | 518.8867  | 629.2857  | 677.2540  |
|                  | O                       | -0.47880800 | -1.14458000 | 0.37218700                   | 742.5058  | 919.6018  | 1079.0721 |
|                  | H                       | 0.73155900  | -1.13502100 | 0.08288100                   | 1105.7027 | 1267.4470 | 1284.5745 |
|                  | C                       | 2.48917800  | -0.06492500 | -0.00235300                  | 1352.3748 | 1365.4610 | 1422.6975 |
|                  | O                       | 1.88236100  | -1.16754100 | -0.06789600                  | 1474.4698 | 1509.9192 | 1643.2586 |
|                  | O                       | 1.98484200  | 1.09277800  | 0.09977200                   | 1759.3168 | 3171.9352 | 3720.2478 |
|                  | H                       | 3.57645100  | -0.10571300 | -0.04042600                  |           |           |           |
| H                | 0.85220000              | 1.18499500  | 0.06475900  |                              |           |           |           |
| PC <sub>FA</sub> | S                       | -1.78010800 | -0.29528400 | -0.22616900                  | 25.1721   | 42.9948   | 86.4406   |
|                  | O                       | -1.93232200 | -0.35793700 | 1.22440800                   | 102.7528  | 143.5735  | 162.9746  |
|                  | O                       | -0.51844100 | 1.97481600  | -0.33548000                  | 172.7776  | 196.6905  | 222.9852  |
|                  | H                       | -0.66830400 | 2.63707900  | 0.34669700                   | 271.3032  | 407.2389  | 507.9122  |
|                  | O                       | -0.60695400 | -0.96626700 | -0.80410500                  | 662.7613  | 669.1936  | 849.7047  |
|                  | H                       | 1.10080100  | -1.17154000 | -0.23521200                  | 1081.0706 | 1123.3847 | 1212.5942 |
|                  | C                       | 2.60513500  | -0.11853000 | 0.22412700                   | 1301.8678 | 1370.6668 | 1428.6805 |
|                  | O                       | 2.04361600  | -1.29877700 | 0.01108900                   | 1651.4450 | 1765.8593 | 3128.0527 |
|                  | O                       | 2.05927700  | 0.96401800  | 0.13702400                   | 3501.0380 | 3611.3456 | 3879.3711 |
|                  | H                       | 3.65602100  | -0.23548400 | 0.49734400                   |           |           |           |
| H                | 0.40098800              | 1.67883500  | -0.19838200 |                              |           |           |           |

| compound                                              | cartesian coordinate(Å) |             |             | frequency( $\text{cm}^{-1}$ ) |            |           |           |
|-------------------------------------------------------|-------------------------|-------------|-------------|-------------------------------|------------|-----------|-----------|
| RC <sub>WM</sub>                                      | S                       | 0.87251500  | 0.07193300  | -0.37725900                   | 62.3764    | 165.3698  | 183.3682  |
|                                                       | O                       | 0.11594100  | 1.33749400  | -0.31260100                   | 234.0332   | 265.8636  | 324.7838  |
|                                                       | O                       | 1.05238000  | -0.39667300 | 1.21352300                    | 409.3767   | 424.3108  | 536.1023  |
|                                                       | H                       | 1.50578800  | 0.33347600  | 1.66394300                    | 617.7362   | 724.7685  | 858.0635  |
|                                                       | O                       | -0.12117500 | -1.11452900 | -0.74738000                   | 876.9386   | 1112.7089 | 1189.9473 |
|                                                       | H                       | -1.01130700 | -0.90441600 | -0.34082700                   | 1347.8156  | 1634.8266 | 3174.3099 |
|                                                       | H                       | -2.57452400 | -0.09693100 | 1.17800900                    | 3670.2138  | 3758.9520 | 3887.6727 |
|                                                       | O                       | -2.31091500 | 0.01091500  | 0.25863800                    |            |           |           |
|                                                       | H                       | -1.77002900 | 0.81927400  | 0.23758200                    |            |           |           |
| TS <sub>WM</sub>                                      | S                       | -0.92213400 | -0.10490000 | -0.30566400                   | -786.5688  | 64.9953   | 276.5646  |
|                                                       | O                       | -1.28392400 | 0.10832600  | 1.10060900                    | 361.9459   | 454.2690  | 482.9446  |
|                                                       | O                       | 0.36245100  | 1.29104400  | -0.52712900                   | 512.4672   | 534.6199  | 619.7150  |
|                                                       | H                       | -0.01089900 | 2.02431800  | -0.01401300                   | 658.6590   | 682.9187  | 946.8784  |
|                                                       | O                       | 0.08621600  | -1.22667300 | -0.48139300                   | 1062.5621  | 1230.2755 | 1402.5021 |
|                                                       | H                       | 1.26295800  | -0.86490500 | 0.05290300                    | 1447.9634  | 1669.6300 | 1718.1809 |
|                                                       | H                       | 1.45825300  | 0.67917800  | 0.04911800                    | 2203.4031  | 3763.1397 | 3813.7178 |
|                                                       | O                       | 2.07325300  | -0.17010600 | 0.34458900                    |            |           |           |
|                                                       | H                       | 2.13986600  | -0.18091100 | 1.30920300                    |            |           |           |
| PC <sub>WM</sub>                                      | S                       | -1.17402700 | -0.10401200 | -0.33007800                   | 22.3347    | 79.0412   | 128.6276  |
|                                                       | O                       | -1.67048000 | 0.25214100  | 0.99746800                    | 141.3135   | 170.0553  | 185.7566  |
|                                                       | O                       | 0.89388200  | 1.62177500  | -0.37019400                   | 208.4819   | 234.6266  | 271.0908  |
|                                                       | H                       | 0.89851800  | 2.34254500  | 0.26683200                    | 421.5895   | 453.3708  | 503.6001  |
|                                                       | O                       | -0.24464700 | -1.23616500 | -0.41974500                   | 700.7430   | 1118.4307 | 1303.9794 |
|                                                       | H                       | 1.70428800  | -1.16272900 | 0.17264700                    | 1630.6824  | 1655.4142 | 3610.2006 |
|                                                       | H                       | 1.60214000  | 1.01818700  | -0.07954400                   | 3751.4088  | 3888.0210 | 3909.8747 |
|                                                       | O                       | 2.48066100  | -0.59379900 | 0.27207500                    |            |           |           |
|                                                       | H                       | 2.90415400  | -0.88541900 | 1.08447800                    |            |           |           |
| TS <sub>U<sub>ncat</sub></sub>                        | S                       | -0.35210300 | 0.03742200  | -0.41862000                   | -1589.0005 | 228.7607  | 430.9480  |
|                                                       | O                       | -1.39039100 | -0.54637100 | 0.41259400                    | 489.6202   | 501.2786  | 662.7370  |
|                                                       | O                       | 0.33213900  | 1.26278500  | 0.24519300                    | 817.0385   | 1016.8424 | 1239.4487 |
|                                                       | H                       | 1.24898400  | 0.49930000  | 0.43381600                    | 1292.3417  | 1932.6476 | 3747.8109 |
|                                                       | O                       | 1.36259900  | -0.73877200 | 0.19491900                    |            |           |           |
|                                                       | H                       | 1.94989100  | -0.91919100 | -0.55753600                   |            |           |           |
| PC <sub>U<sub>ncat</sub></sub>                        | S                       | 0.64468900  | 0.00000700  | -0.37725000                   | 24.2711    | 89.7166   | 105.4362  |
|                                                       | O                       | 0.74995200  | -1.25490900 | 0.36820800                    | 129.2983   | 218.8321  | 244.6129  |
|                                                       | O                       | -2.18438400 | -0.00004500 | -0.09376300                   | 500.7708   | 1111.8266 | 1308.9823 |
|                                                       | H                       | -2.41907400 | -0.76110700 | 0.44738300                    | 1628.1927  | 3802.7181 | 3926.2607 |
|                                                       | O                       | 0.74978800  | 1.25495500  | 0.36818800                    |            |           |           |
|                                                       | H                       | -2.41879900 | 0.76098300  | 0.44755200                    |            |           |           |
| H <sub>2</sub> SO <sub>3</sub> ( <i>cis-cis</i> )     | S                       | -0.000003   | 0.111069    | -0.438378                     | 126.3792   | 339.2728  | 408.2412  |
|                                                       | O                       | 0.000123    | 1.374565    | 0.309988                      | 442.2980   | 484.6238  | 769.1334  |
|                                                       | O                       | 1.255834    | -0.751948   | 0.155137                      | 779.4566   | 1082.2596 | 1108.1792 |
|                                                       | O                       | -1.255969   | -0.751732   | 0.155140                      | 1254.7515  | 3696.9858 | 3698.6878 |
|                                                       | H                       | -1.471241   | -0.372119   | 1.026062                      |            |           |           |
|                                                       | H                       | 1.471396    | -0.372074   | 1.025871                      |            |           |           |
| H <sub>2</sub> SO <sub>3</sub> ( <i>trans-trans</i> ) | S                       | -0.000088   | 0.140499    | 0.401265                      | 176.774    | 249.1102  | 366.7285  |
|                                                       | O                       | 1.250242    | -0.678579   | -0.299028                     | 431.2504   | 501.0832  | 732.1629  |
|                                                       | O                       | -1.249173   | -0.680583   | -0.298806                     | 757.2215   | 1071.3886 | 1117.8083 |
|                                                       | H                       | -1.550805   | -1.353581   | 0.330885                      | 1301.6225  | 3764.2936 | 3767.7290 |
|                                                       | H                       | 1.554461    | -1.349579   | 0.331544                      |            |           |           |
|                                                       | O                       | -0.001350   | 1.416058    | -0.287499                     |            |           |           |

Table S2: Bimolecular rate constant  $k_b$  in ( $\text{cm}^3 \text{ molecule}^{-1} \text{ sec}^{-1}$ ) of AM, FA, and WM catalyzed channel within the temperature of 213-1000 K.

| Å Temp (K) | $K_{eq}^{AM}$          | $k_{uni}^{AM}$        | $k_b^{AM}$             | $K_{eq}^{FA}$          | $k_{uni}^{FA}$        | $k_b^{FA}$             | $K_{eq}^{WM}$          | $k_{uni}^{WM}$        | $k_b^{WM}$             |
|------------|------------------------|-----------------------|------------------------|------------------------|-----------------------|------------------------|------------------------|-----------------------|------------------------|
| 213        | $7.73 \times 10^{-11}$ | $3.01 \times 10^3$    | $2.32 \times 10^{-7}$  | $7.16 \times 10^{-16}$ | $4.47 \times 10^5$    | $3.20 \times 10^{-10}$ | $6.89 \times 10^{-17}$ | $3.81 \times 10^{-2}$ | $2.62 \times 10^{-18}$ |
| 216        | $4.65 \times 10^{-11}$ | $3.94 \times 10^3$    | $1.83 \times 10^{-7}$  | $4.88 \times 10^{-16}$ | $5.28 \times 10^5$    | $2.58 \times 10^{-10}$ | $4.99 \times 10^{-17}$ | $5.67 \times 10^{-2}$ | $2.83 \times 10^{-18}$ |
| 219        | $2.83 \times 10^{-11}$ | $5.11 \times 10^3$    | $1.45 \times 10^{-7}$  | $3.36 \times 10^{-16}$ | $6.21 \times 10^5$    | $2.09 \times 10^{-10}$ | $3.65 \times 10^{-17}$ | $8.36 \times 10^{-2}$ | $3.05 \times 10^{-18}$ |
| 224        | $1.28 \times 10^{-11}$ | $7.77 \times 10^3$    | $9.94 \times 10^{-8}$  | $1.85 \times 10^{-16}$ | $8.11 \times 10^5$    | $1.50 \times 10^{-10}$ | $2.20 \times 10^{-17}$ | $1.57 \times 10^{-1}$ | $3.45 \times 10^{-18}$ |
| 235        | $2.51 \times 10^{-12}$ | $1.84 \times 10^4$    | $4.62 \times 10^{-8}$  | $5.44 \times 10^{-17}$ | $1.42 \times 10^6$    | $7.74 \times 10^{-11}$ | $7.86 \times 10^{-18}$ | $5.73 \times 10^{-1}$ | $4.51 \times 10^{-18}$ |
| 250        | $3.45 \times 10^{-13}$ | $5.25 \times 10^4$    | $1.81 \times 10^{-8}$  | $1.23 \times 10^{-17}$ | $2.90 \times 10^6$    | $3.56 \times 10^{-11}$ | $2.24 \times 10^{-18}$ | 2.84                  | $6.35 \times 10^{-18}$ |
| 259        | $1.18 \times 10^{-13}$ | $9.29 \times 10^4$    | $1.09 \times 10^{-8}$  | $5.47 \times 10^{-18}$ | $4.33 \times 10^6$    | $2.37 \times 10^{-11}$ | $1.13 \times 10^{-18}$ | 6.81                  | $7.71 \times 10^{-18}$ |
| 265        | $5.97 \times 10^{-14}$ | $1.33 \times 10^5$    | $7.94 \times 10^{-9}$  | $3.29 \times 10^{-18}$ | $5.58 \times 10^6$    | $1.84 \times 10^{-11}$ | $7.38 \times 10^{-19}$ | $1.18 \times 10^1$    | $8.73 \times 10^{-18}$ |
| 278        | $1.52 \times 10^{-14}$ | $2.75 \times 10^5$    | $4.18 \times 10^{-9}$  | $1.19 \times 10^{-18}$ | $9.41 \times 10^6$    | $1.12 \times 10^{-11}$ | $3.11 \times 10^{-19}$ | $3.63 \times 10^1$    | $1.13 \times 10^{-17}$ |
| 280        | $1.25 \times 10^{-14}$ | $3.05 \times 10^5$    | $3.81 \times 10^{-9}$  | $1.02 \times 10^{-18}$ | $1.02 \times 10^7$    | $1.04 \times 10^{-11}$ | $2.75 \times 10^{-19}$ | $4.27 \times 10^1$    | $1.17 \times 10^{-17}$ |
| 290        | $4.83 \times 10^{-15}$ | $5.05 \times 10^5$    | $2.44 \times 10^{-9}$  | $5.04 \times 10^{-19}$ | $1.47 \times 10^7$    | $7.42 \times 10^{-12}$ | $1.51 \times 10^{-19}$ | $9.34 \times 10^1$    | $1.41 \times 10^{-17}$ |
| 298        | $2.37 \times 10^{-15}$ | $7.39 \times 10^5$    | $1.75 \times 10^{-9}$  | $2.96 \times 10^{-19}$ | $1.95 \times 10^7$    | $5.78 \times 10^{-12}$ | $9.61 \times 10^{-20}$ | $1.69 \times 10^2$    | $1.62 \times 10^{-17}$ |
| 300        | $1.99 \times 10^{-15}$ | $8.10 \times 10^5$    | $1.61 \times 10^{-9}$  | $2.61 \times 10^{-19}$ | $2.09 \times 10^7$    | $5.45 \times 10^{-12}$ | $8.63 \times 10^{-20}$ | $1.94 \times 10^2$    | $1.68 \times 10^{-17}$ |
| 310        | $8.72 \times 10^{-16}$ | $1.26 \times 10^6$    | $1.10 \times 10^{-9}$  | $1.41 \times 10^{-19}$ | $2.91 \times 10^7$    | $4.10 \times 10^{-12}$ | $5.12 \times 10^{-20}$ | $3.86 \times 10^2$    | $1.98 \times 10^{-17}$ |
| 320        | $4.02 \times 10^{-16}$ | $1.90 \times 10^6$    | $7.64 \times 10^{-10}$ | $7.93 \times 10^{-20}$ | $3.98 \times 10^7$    | $3.16 \times 10^{-12}$ | $3.15 \times 10^{-20}$ | $7.36 \times 10^2$    | $2.32 \times 10^{-17}$ |
| 330        | $1.95 \times 10^{-16}$ | $2.80 \times 10^6$    | $5.45 \times 10^{-10}$ | $4.63 \times 10^{-20}$ | $5.36 \times 10^7$    | $2.48 \times 10^{-12}$ | $2.00 \times 10^{-20}$ | $1.35 \times 10^3$    | $2.69 \times 10^{-17}$ |
| 350        | $5.19 \times 10^{-17}$ | $5.67 \times 10^6$    | $2.94 \times 10^{-10}$ | $1.74 \times 10^{-20}$ | $9.25 \times 10^7$    | $1.61 \times 10^{-12}$ | $8.70 \times 10^{-21}$ | $4.08 \times 10^3$    | $3.55 \times 10^{-17}$ |
| 375        | $1.22 \times 10^{-17}$ | $1.23 \times 10^7$    | $1.51 \times 10^{-10}$ | $5.97 \times 10^{-21}$ | $1.70 \times 10^8$    | $1.02 \times 10^{-12}$ | $3.52 \times 10^{-21}$ | $1.38 \times 10^4$    | $4.86 \times 10^{-17}$ |
| 400        | $3.46 \times 10^{-18}$ | $2.43 \times 10^7$    | $8.42 \times 10^{-11}$ | $2.37 \times 10^{-21}$ | $2.91 \times 10^8$    | $6.88 \times 10^{-13}$ | $1.60 \times 10^{-21}$ | $4.02 \times 10^4$    | $6.44 \times 10^{-17}$ |
| 425        | $1.15 \times 10^{-18}$ | $4.42 \times 10^7$    | $5.07 \times 10^{-11}$ | $1.05 \times 10^{-21}$ | $4.70 \times 10^8$    | $4.94 \times 10^{-13}$ | $8.07 \times 10^{-22}$ | $1.03 \times 10^5$    | $8.31 \times 10^{-17}$ |
| 500        | $8.35 \times 10^{-20}$ | $1.84 \times 10^8$    | $1.54 \times 10^{-11}$ | $1.56 \times 10^{-22}$ | $1.50 \times 10^9$    | $2.34 \times 10^{-13}$ | $1.61 \times 10^{-22}$ | $9.81 \times 10^5$    | $1.58 \times 10^{-16}$ |
| 550        | $2.22 \times 10^{-20}$ | $3.83 \times 10^8$    | $8.50 \times 10^{-12}$ | $5.99 \times 10^{-23}$ | $2.74 \times 10^9$    | $1.64 \times 10^{-13}$ | $7.17 \times 10^{-23}$ | $3.13 \times 10^6$    | $2.24 \times 10^{-16}$ |
| 600        | $7.46 \times 10^{-21}$ | $7.04 \times 10^8$    | $5.25 \times 10^{-12}$ | $2.74 \times 10^{-23}$ | $4.56 \times 10^9$    | $1.25 \times 10^{-13}$ | $3.72 \times 10^{-23}$ | $8.20 \times 10^6$    | $3.05 \times 10^{-16}$ |
| 650        | $3.01 \times 10^{-21}$ | $1.18 \times 10^9$    | $3.55 \times 10^{-12}$ | $1.44 \times 10^{-23}$ | $7.04 \times 10^9$    | $1.01 \times 10^{-13}$ | $2.17 \times 10^{-23}$ | $1.86 \times 10^7$    | $4.02 \times 10^{-16}$ |
| 700        | $1.40 \times 10^{-21}$ | $1.83 \times 10^9$    | $2.56 \times 10^{-12}$ | $8.39 \times 10^{-24}$ | $1.03 \times 10^{10}$ | $8.60 \times 10^{-14}$ | $1.38 \times 10^{-23}$ | $3.73 \times 10^7$    | $5.17 \times 10^{-16}$ |
| 750        | $7.31 \times 10^{-22}$ | $2.67 \times 10^9$    | $1.95 \times 10^{-12}$ | $5.32 \times 10^{-24}$ | $1.42 \times 10^{10}$ | $7.57 \times 10^{-14}$ | $9.49 \times 10^{-24}$ | $6.85 \times 10^7$    | $6.50 \times 10^{-16}$ |
| 800        | $4.18 \times 10^{-22}$ | $3.73 \times 10^9$    | $1.56 \times 10^{-12}$ | $3.61 \times 10^{-24}$ | $1.90 \times 10^{10}$ | $6.87 \times 10^{-14}$ | $6.89 \times 10^{-24}$ | $1.17 \times 10^8$    | $8.03 \times 10^{-16}$ |
| 850        | $2.58 \times 10^{-22}$ | $4.99 \times 10^9$    | $1.29 \times 10^{-12}$ | $2.59 \times 10^{-24}$ | $2.47 \times 10^{10}$ | $6.38 \times 10^{-14}$ | $5.25 \times 10^{-24}$ | $1.86 \times 10^8$    | $9.79 \times 10^{-16}$ |
| 900        | $1.69 \times 10^{-22}$ | $6.48 \times 10^9$    | $1.10 \times 10^{-12}$ | $1.94 \times 10^{-24}$ | $3.11 \times 10^{10}$ | $6.04 \times 10^{-14}$ | $4.16 \times 10^{-24}$ | $2.84 \times 10^8$    | $1.18 \times 10^{-15}$ |
| 950        | $1.17 \times 10^{-22}$ | $8.17 \times 10^9$    | $9.57 \times 10^{-13}$ | $1.52 \times 10^{-24}$ | $3.84 \times 10^{10}$ | $5.82 \times 10^{-14}$ | $3.40 \times 10^{-24}$ | $4.13 \times 10^8$    | $1.41 \times 10^{-15}$ |
| 1000       | $8.46 \times 10^{-23}$ | $1.01 \times 10^{10}$ | $8.53 \times 10^{-13}$ | $1.22 \times 10^{-24}$ | $4.65 \times 10^{10}$ | $5.68 \times 10^{-14}$ | $2.86 \times 10^{-24}$ | $5.80 \times 10^8$    | $1.66 \times 10^{-15}$ |

Table S3: Half life time in sec. for the catalyzed and uncatalyzed channel at room temperature.

| Temp (K) | AM catalyzed          |                       |                       | FA catalyzed       |                    | WM catalyzed          |                       | Uncat              |
|----------|-----------------------|-----------------------|-----------------------|--------------------|--------------------|-----------------------|-----------------------|--------------------|
|          | 0.1ppbv               | 10ppbv                | 2900ppbv              | 0.01ppbv           | 10ppbv             | 20%RH                 | 100%RH                |                    |
| 280      | $2.18 \times 10^{-1}$ | $2.18 \times 10^{-3}$ | $7.50 \times 10^{-6}$ | $7.48 \times 10^5$ | $7.48 \times 10^2$ | 1.22                  | $2.44 \times 10^{-1}$ | $5.70 \times 10^5$ |
| 290      | $2.76 \times 10^{-1}$ | $2.76 \times 10^{-3}$ | $9.52 \times 10^{-6}$ | $7.25 \times 10^5$ | $7.25 \times 10^2$ | $4.95 \times 10^{-1}$ | $9.90 \times 10^{-2}$ | $2.15 \times 10^5$ |
| 298      | $3.77 \times 10^{-1}$ | $3.77 \times 10^{-3}$ | $1.30 \times 10^{-5}$ | $7.08 \times 10^5$ | $7.08 \times 10^2$ | $2.96 \times 10^{-1}$ | $5.93 \times 10^{-2}$ | $9.87 \times 10^4$ |
| 300      | $4.08 \times 10^{-1}$ | $4.08 \times 10^{-3}$ | $1.41 \times 10^{-5}$ | $7.03 \times 10^5$ | $7.03 \times 10^2$ | $2.33 \times 10^{-1}$ | $4.67 \times 10^{-2}$ | $8.12 \times 10^4$ |
| 310      | $4.77 \times 10^{-1}$ | $4.77 \times 10^{-3}$ | $1.65 \times 10^{-5}$ | $6.81 \times 10^5$ | $6.81 \times 10^2$ | $1.07 \times 10^{-1}$ | $2.13 \times 10^{-2}$ | $3.09 \times 10^4$ |
| 320      | $6.63 \times 10^{-1}$ | $6.63 \times 10^{-3}$ | $2.29 \times 10^{-5}$ | $6.59 \times 10^5$ | $6.59 \times 10^2$ | $5.82 \times 10^{-2}$ | $1.16 \times 10^{-2}$ | $1.19 \times 10^4$ |

Table S4: Concentration of Ammonia, Formic acid and Water (in molecules  $\text{cm}^{-3}$ ) within the temperature range of 280-320 K

| Temp (K) | Ammonia            |                       |                       | Formic acid        |                       | Water                 |                       |
|----------|--------------------|-----------------------|-----------------------|--------------------|-----------------------|-----------------------|-----------------------|
|          | 0.1ppv             | 10ppbv                | 2900ppbv              | 0.01ppbv           | 10ppbv                | 20%H                  | 100%H                 |
| 280      | $2.62 \times 10^9$ | $2.62 \times 10^{11}$ | $7.60 \times 10^{13}$ | $2.62 \times 10^8$ | $2.62 \times 10^{11}$ | $5.16 \times 10^{16}$ | $2.58 \times 10^{17}$ |
| 290      | $2.53 \times 10^9$ | $2.53 \times 10^{11}$ | $7.34 \times 10^{13}$ | $2.53 \times 10^8$ | $2.53 \times 10^{11}$ | $9.56 \times 10^{16}$ | $4.78 \times 10^{17}$ |
| 298      | $2.46 \times 10^9$ | $2.46 \times 10^{11}$ | $7.13 \times 10^{13}$ | $2.46 \times 10^8$ | $2.46 \times 10^{11}$ | $1.55 \times 10^{17}$ | $7.73 \times 10^{17}$ |
| 300      | $2.44 \times 10^9$ | $2.44 \times 10^{11}$ | $7.08 \times 10^{13}$ | $2.44 \times 10^8$ | $2.44 \times 10^{11}$ | $1.72 \times 10^{17}$ | $8.58 \times 10^{17}$ |
| 310      | $2.36 \times 10^9$ | $2.36 \times 10^{11}$ | $6.84 \times 10^{13}$ | $2.36 \times 10^8$ | $2.36 \times 10^{11}$ | $2.92 \times 10^{17}$ | $1.46 \times 10^{18}$ |
| 320      | $2.29 \times 10^9$ | $2.29 \times 10^{11}$ | $6.64 \times 10^{13}$ | $2.29 \times 10^8$ | $2.29 \times 10^{11}$ | $4.70 \times 10^{17}$ | $2.35 \times 10^{18}$ |

Table S5: Average concentration of Ammonia, Formic acid and Water (in molecules  $\text{cm}^{-3}$ ) at higher altitude.

| Altitude (km) | Temp (K) | Ammonia            | Formic acid           | Water                 |
|---------------|----------|--------------------|-----------------------|-----------------------|
| 15            | 213      | $1.20 \times 10^8$ | $3.20 \times 10^9$    | $2.00 \times 10^{13}$ |
| 10            | 230      | $8.50 \times 10^8$ | $8.30 \times 10^9$    | $4.90 \times 10^{15}$ |
| 5             | 259      | $7.60 \times 10^9$ | $2.00 \times 10^{10}$ | $2.40 \times 10^{16}$ |



Table S6: Absolute energies in Hartree for the AM, FA, and WM catalyzed species as well as for the uncatalyzed species optimized at MP2/aug-cc-pVTZ level of theory.

| Catalyst | Species             | MP2/aug-cc-pVTZ | CCSD(T)/aug-cc-pVTZ | CCSD(T)/aug-cc-pVDZ | CCSD(T)/CBS     |
|----------|---------------------|-----------------|---------------------|---------------------|-----------------|
| None     | cis-cis             | -624.2865771    | -624.3314174        | -624.0543806        | -624.4602388813 |
|          | cis-trans           | -624.2852928    | -624.3298599        | -624.0527504        | -624.4587371021 |
|          | trans-trans         | -624.2788033    | -624.3231526        | -624.0457362        | -624.4520617652 |
|          | TS <sub>uncat</sub> | -624.2437867    | -624.2834554        | -624.0093838        | -624.4114112324 |
|          | PC <sub>uncat</sub> | -624.3009192    | -624.3404773        | -624.0671367        | -624.4684902367 |
| AM       | RC <sub>AM</sub>    | -680.7687116    | -680.8326127        | -680.499944         | -680.9881799874 |
|          | TS <sub>AM</sub>    | -680.7603585    | -680.8192494        | -680.4892874        | -680.9745445486 |
|          | PC <sub>AM</sub>    | -680.7785951    | -680.837934         | -680.5098007        | -680.9924957142 |
| FA       | RC <sub>FA</sub>    | -813.7940338    | -813.7940338        | -813.4310599        | -814.0765183028 |
|          | TS <sub>FA</sub>    | -813.7802465    | -813.7802465        | -813.4124196        | -814.05851221   |
|          | PC <sub>FA</sub>    | -813.8072671    | -813.8072671        | -813.44302          | -814.0846538875 |
| WM       | RC <sub>WM</sub>    | -700.6328388    | -700.6909988        | -700.3450377        | -700.8537825188 |
|          | TS <sub>WM</sub>    | -700.6127721    | -700.6658186        | -700.3207028        | -700.8281029186 |
|          | PC <sub>WM</sub>    | -700.6446555    | -700.6977199        | -700.3561171        | -700.859440685  |

Table S7: Product branching ratio ( $\gamma$ ) of catalyzed channels at 1 atm pressure.

| P (atm) | Temp (K) | AM catalyzed          | FA catalyzed          | WM catalyzed          |
|---------|----------|-----------------------|-----------------------|-----------------------|
| 1.0     | 213      | $5.47 \times 10^{-3}$ | $8.95 \times 10^{-1}$ | $1.30 \times 10^{-5}$ |
|         | 216      | $5.34 \times 10^{-3}$ | $9.16 \times 10^{-1}$ | $2.70 \times 10^{-5}$ |
|         | 219      | $5.21 \times 10^{-3}$ | $9.16 \times 10^{-1}$ | $3.10 \times 10^{-5}$ |
|         | 224      | $4.80 \times 10^{-3}$ | $9.25 \times 10^{-1}$ | $3.10 \times 10^{-5}$ |
|         | 235      | $4.60 \times 10^{-3}$ | $9.44 \times 10^{-1}$ | $4.60 \times 10^{-5}$ |
|         | 250      | $3.52 \times 10^{-3}$ | $9.56 \times 10^{-1}$ | $7.00 \times 10^{-5}$ |
|         | 259      | $3.51 \times 10^{-3}$ | $9.58 \times 10^{-1}$ | $6.10 \times 10^{-5}$ |
|         | 265      | $2.99 \times 10^{-3}$ | $9.60 \times 10^{-1}$ | $9.60 \times 10^{-5}$ |
|         | 278      | $2.92 \times 10^{-3}$ | $9.60 \times 10^{-1}$ | $1.09 \times 10^{-4}$ |
|         | 280      | $2.55 \times 10^{-3}$ | $9.61 \times 10^{-1}$ | $1.08 \times 10^{-4}$ |
|         | 290      | $2.33 \times 10^{-3}$ | $9.61 \times 10^{-1}$ | $1.39 \times 10^{-4}$ |
|         | 298      | $1.92 \times 10^{-3}$ | $9.61 \times 10^{-1}$ | $1.40 \times 10^{-4}$ |
|         | 300      | $1.83 \times 10^{-3}$ | $9.62 \times 10^{-1}$ | $1.59 \times 10^{-4}$ |
|         | 310      | $1.81 \times 10^{-3}$ | $9.62 \times 10^{-1}$ | $1.98 \times 10^{-4}$ |
|         | 320      | $1.50 \times 10^{-3}$ | $9.62 \times 10^{-1}$ | $2.18 \times 10^{-4}$ |

Table S8: Product branching ratio ( $\gamma$ ) of catalyzed channels at higher altitudes.

| P (atm) | Temp (K) | AM catalyzed          | FA catalyzed          | WM catalyzed          |
|---------|----------|-----------------------|-----------------------|-----------------------|
| 0.12    | 213      | $3.81 \times 10^{-3}$ | $9.91 \times 10^{-1}$ | $3.00 \times 10^{-5}$ |
| 0.27    | 230      | $3.65 \times 10^{-3}$ | $9.80 \times 10^{-1}$ | $4.70 \times 10^{-5}$ |
| 0.54    | 259      | $2.89 \times 10^{-3}$ | $9.78 \times 10^{-1}$ | $8.60 \times 10^{-5}$ |

Table S9: Product branching ratio ( $\gamma$ ) of catalyzed channels at 298K.

| P (atm) | Temp (K) | AM catalyzed          | FA catalyzed          | WM catalyzed          |
|---------|----------|-----------------------|-----------------------|-----------------------|
| 0.10    | 298      | $1.12 \times 10^{-3}$ | $9.67 \times 10^{-1}$ | $1.70 \times 10^{-4}$ |
| 0.50    |          | $1.79 \times 10^{-3}$ | $9.69 \times 10^{-1}$ | $1.80 \times 10^{-4}$ |
| 1.0     |          | $1.92 \times 10^{-3}$ | $9.70 \times 10^{-1}$ | $1.50 \times 10^{-4}$ |
| 5.0     |          | $4.70 \times 10^{-3}$ | $9.72 \times 10^{-1}$ | $1.70 \times 10^{-4}$ |
| 10.0    |          | $5.23 \times 10^{-3}$ | $9.80 \times 10^{-1}$ | $1.70 \times 10^{-4}$ |

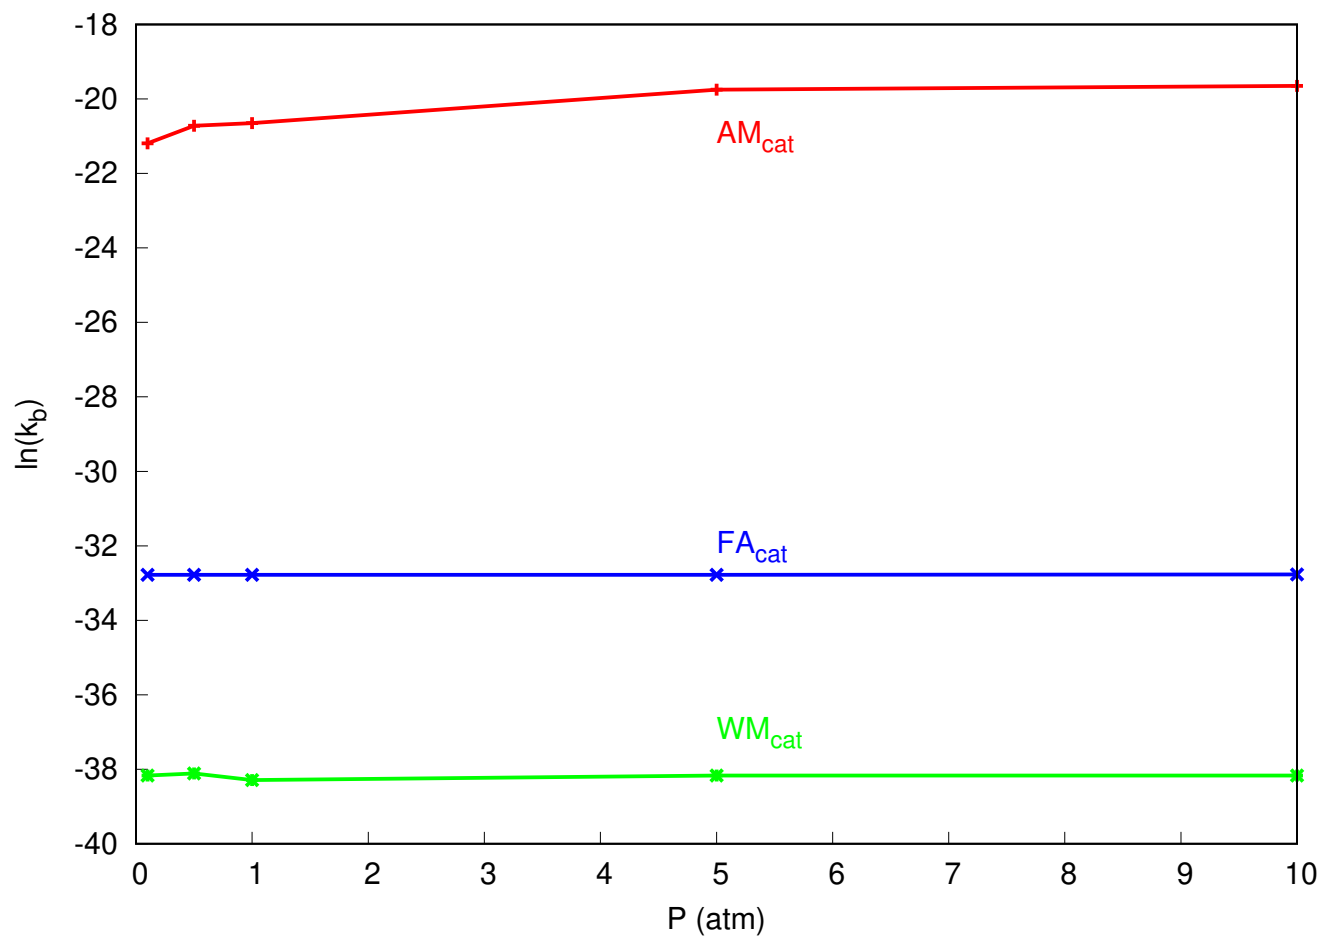

Figure S1: Pressure dependence plot for the decomposition reaction of  $H_2SO_3$  in the presence of AM, FA, and WM at 298 K.

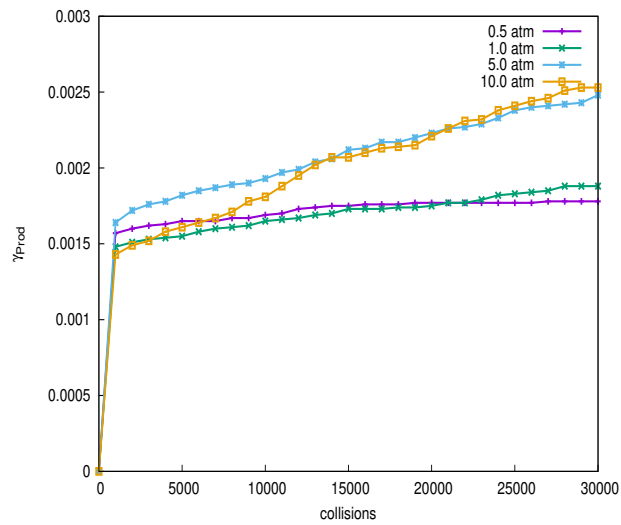

AM catalyzed

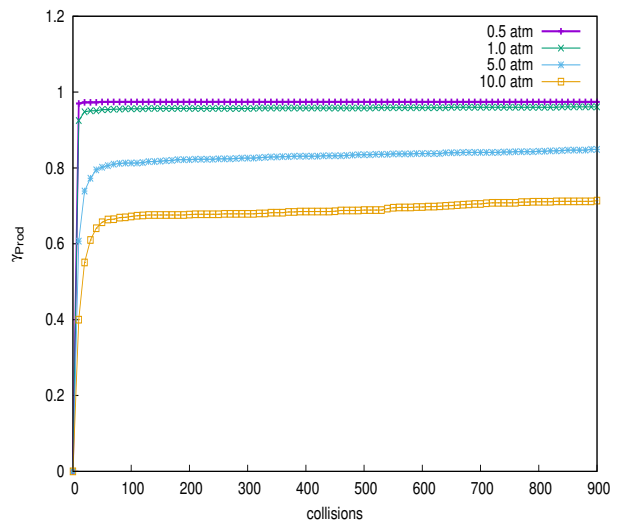

FA catalyzed

Figure S2: Time evolution of the relative population of the product complex for AM and FA catalyzed channels at 298 K.
